# Supplementary material for: Genetic Characterization of the Central Variable Region in African Swine Fever Virus Isolates in the Russian Federation from 2013 to 2017
Source: MDPI journal article supplement (doi:10.3390/pathogens11080919), 2022-08-15
Supplement: s1 [file s1]

Supplementary Table S1. List of isolates obtained from Genbank used in this study to compare with new isolates from the RF.

| <b>Isolate</b>            | <b>Country</b> | <b>Accession number</b> | <b>CVR Group</b> |
|---------------------------|----------------|-------------------------|------------------|
| Georgia_2007/1            | Georgia        | FR682468.2              | 1                |
| Abko7                     | Georgia        | JX857523.1              | 2                |
| Arm07                     | Armenia        | JX857522.1              | 1                |
| Azo8D                     | Azerbaijan     | JX857529.1              | 2                |
| Azo8B                     | Azerbaijan     | JX857530.1              | 2                |
| Ukr12/Zapo                | Ukraine        | JX857535.1              | 2                |
| Krasnodar2016             | Russia         | KY372398.1              | 5                |
| ASFV/Ulyanovsk_19/WB-5699 | Russia         | MW306192.1              | 5                |
| Tambov2016                | Russia         | KY372399.1              | 5                |
| Che07                     | Russia         | JX857524.1              | 2                |
| Ingo8                     | Russia         | JX857525.1              | 2                |
| Oren08                    | Russia         | JX857526.1              | 2                |
| NOo8/Av                   | Russia         | JX857527.1              | 1                |
| NOo8/Ap                   | Russia         | JX857528.1              | 1                |
| Rostov09                  | Russia         | JX857532.1              | 2                |
| Dagestan09                | Russia         | JX857531.1              | 2                |
| Kalmykia09                | Russia         | JX857533.1              | 2                |
| StPet09                   | Russia         | JX857534.1              | 2                |
| Tver1112/Zavi             | Russia         | KJ627202.1              | 1                |
| Tver0312/Novo             | Russia         | KJ627201.1              | 1                |
| Tver0312/Torjo            | Russia         | KJ627200.1              | 1                |
| Tver0712/Les              | Russia         | KJ627199.1              | 1                |

|                                   |        |            |   |
|-----------------------------------|--------|------------|---|
| Tvero812/Bolo                     | Russia | KJ627198.1 | 1 |
| Tvero511/Torjo                    | Russia | KJ627197.1 | 1 |
| ASFV/Kaliningrad_18/WB-9734       | Russia | OM966721   | 1 |
| ASFV/Kaliningrad_18/WB-9735       | Russia | OM966716   | 1 |
| ASFV/Kaliningrad_18/WB-9763       | Russia | OM966717   | 1 |
| ASFV/Kaliningrad_18/WB-12524      | Russia | OM966715   | 1 |
| ASFV/Kaliningrad_18/WB-9766       | Russia | OM966718   | 1 |
| ASFV/Kaliningrad_18/WB-12523      | Russia | OM966714   | 1 |
| ASFV/Kaliningrad_18/WB-12516      | Russia | OM966720   | 1 |
| ASFV/Kaliningrad_19/WB-10168      | Russia | OM966719   | 1 |
| ASFV/Kabardino-Balkaria_19/WB-964 | Russia | MT459800.1 | 1 |
| ASFV/Odintsovo_2014/WB            | Russia | KP843857.1 | 1 |
| ASFV/Primorsky_19/WB-6723         | Russia | MW306191.1 | 1 |
| ASFV/Amur_19/WB-6905              | Russia | MW306190.1 | 1 |
| ASFV/Zabaykali_2020/WB-5314       | Russia | MZ325862.1 | 1 |
| Amur/19.08.19                     | Russia | MT840357.1 | 1 |
| Irkutsk2017                       | Russia | KY938010.1 | 1 |
| Kursk_2015                        | Russia | KY367260.1 | 1 |
| Orel2015                          | Russia | KY372397.1 | 1 |
| ASFV/Kaliningrad_17/WB-           | Russia | OM799941   | 1 |

|                  |         |            |   |
|------------------|---------|------------|---|
| 13869            |         |            |   |
| Est16/WB/Tartu17 | Estonia | MT647531.1 | 3 |
| Est15/WB/Tartu14 | Estonia | MT647530.1 | 3 |
| Est15/WB/Tartu4  | Estonia | MT647529.1 | 3 |
| Est15/WB/Tartu2  | Estonia | MT647528.1 | 3 |
| Est15/WB/Tartu1  | Estonia | MT647527.1 | 1 |
| Est15/WB-Tartu37 | Estonia | MT647534.1 | 1 |
| Est15/WB-Tartu39 | Estonia | MT647535.1 | 1 |
| Est16/WB/Tartu19 | Estonia | MT647533.1 | 3 |
| Est16/WB/Tartu18 | Estonia | MT647532.1 | 3 |
| Est15/WB-Tartu40 | Estonia | MT647540.1 | 1 |
| Est16/WB-Tartu56 | Estonia | MT647543.1 | 1 |
| Est15/WB-Tartu47 | Estonia | MT647542.1 | 1 |
| Est17/DP/Parnu1  | Estonia | MT647544.1 | 1 |
| Est17/DP/Parnu2  | Estonia | MT647545.1 | 1 |
| Est17/DP/Parnu3  | Estonia | MT647546.1 | 4 |
| Est17/DP/Parnu4  | Estonia | MT647547.1 | 4 |
| Est17/WB/HARJU6  | Estonia | MT647548.1 | 4 |
| Est17/WB/LANE12  | Estonia | MT647549.1 | 1 |
| Est17/WB/Parnu11 | Estonia | MT647550.1 | 1 |
| Est17/WB/Parnu12 | Estonia | MT647551.1 | 1 |
| Est17/WB/Parnu13 | Estonia | MT647552.1 | 1 |
| Est17/WB/Parnu14 | Estonia | MT647553.1 | 1 |
| Est16/WB/LANE22  | Estonia | MT647554.1 | 1 |
| Est16/WB/LANE23  | Estonia | MT647555.1 | 1 |
| Est17/WB/Parnu15 | Estonia | MT647556.1 | 1 |

|                           |         |            |   |
|---------------------------|---------|------------|---|
| Est17/WB/LANE27           | Estonia | MT647557.1 | 1 |
| Est17/WB/Parnu16          | Estonia | MT647558.1 | 1 |
| Est17/WB/Harju12          | Estonia | MT647559.1 | 1 |
| Est17/WB/Parnu17          | Estonia | MT647560.1 | 1 |
| Est17/WB/Parnu18          | Estonia | MT647561.1 | 1 |
| Est17/WB/Parnu19          | Estonia | MT647562.1 | 1 |
| Est17/WB/Parnu20          | Estonia | MT647564.1 | 1 |
| Est17/WB/Harju13          | Estonia | MT647563.1 | 1 |
| Est17/WB/LANE31           | Estonia | MT647565.1 | 1 |
| Est17/DP/Parnu5           | Estonia | MT647566.1 | 1 |
| Est17/DP/Parnu6           | Estonia | MT647567.1 | 1 |
| ASFV_POL/2015/Podlaskie   | Poland  | MH681419.1 | 1 |
| ASFV_Pol16_20538_09       | Poland  | MG939584.1 | 1 |
| ASFV_Pol16_29413_023      | Poland  | MG939586.1 | 1 |
| ASFV_Pol16_20540_010      | Poland  | MG939585.1 | 1 |
| ASFV_Pol16_20186_07       | Poland  | MG939583.1 | 1 |
| ASFV_Pol17_55892_C754     | Poland  | MT847620.1 | 1 |
| ASFV_Pol17_31177_O81      | Poland  | MT847622.1 | 1 |
| ASFV_Pol17_04461_C210     | Poland  | MG939588.1 | 1 |
| ASFV_Pol17_03029_C201     | Poland  | MG939587.1 | 1 |
| ASFV_Pol17_05838_C220     | Poland  | MG939589.1 | 1 |
| ASFV_Pol18_28298_O111     | Poland  | MT847621.1 | 1 |
| ASFV_Pol19_53050_C1959/19 | Poland  | MT847623.2 | 1 |
| Pol14/Sz                  | Poland  | KJ627206.1 | 1 |
| Pol14/Krus_pB602L         | Poland  | KJ627207.1 | 1 |
| RO/SM/2017/CVR            | Romania | MN809122.1 | 1 |

|                                  |               |            |   |
|----------------------------------|---------------|------------|---|
| LT14/1482                        | Lithuania     | KJ627205.1 | 1 |
| LT14/1490                        | Lithuania     | KJ627204.1 | 1 |
| Bel13/Grodno                     | Belarus       | KJ627203.1 | 1 |
| ASFV/LT14/1490                   | Lithuania     | MK628478.1 | 1 |
| ASFV_CzechRepublic_2017/1        | CzechRepublic | LR722600.1 | 1 |
| ASFV_Moldova_2017/1              | Moldova       | LR722599.1 | 1 |
| ASFV_Belgium_2018/1              | Belgium       | LR536725.1 | 1 |
| ASFV_Germany_2020/1              | Germany       | LR899193.1 | 1 |
| ASFV/pig/China/CAS19-01/2019     | China         | MN172368.1 | 1 |
| ASFV_China_DB/LN/2018            | China         | MK333181.1 | 1 |
| ASFV_China_ASFV-wbBS01           | China         | MK645909.1 | 1 |
| ASFV_China/2018/AnhuiXCGQ        | China         | MK128995.1 | 1 |
| ASFV_China_Pig/HLJ/2018          | China         | MK333180.1 | 1 |
| ASFV_Wuhan_2019-1                | China         | MN393476.1 | 1 |
| ASFV_CN/2019/InnerMongolia-AES01 | China         | MK940252.1 | 1 |
| ASFV-wbBS01                      | China         | MK238344.1 | 1 |
| IND/AS/SD-02/2020                | India         | MT642590.1 | 1 |
| IND/AS/SD-13/2020                | India         | MT642591.1 | 1 |
| IND/AR/SD-61/2020                | India         | MT642593.1 | 1 |
| IND/AR/SD-59/2020                | India         | MT642592.1 | 1 |
| VNUA_NA-ASF6                     | VietNam       | MZ812718.1 | 1 |
| ASF/POB(BLOOD)/VietNam/2019      | VietNam       | MW451101.1 | 1 |
| ASF/POT(TISSUE)/VietNam/2        | VietNam       | MW451100.1 | 1 |

|                      |                |            |   |
|----------------------|----------------|------------|---|
| 019                  |                |            |   |
| ASF/P1/VietNam/2019  | VietNam        | MW451102.1 | 1 |
| ASF/P5/VietNam/2019  | VietNam        | MW451103.1 | 1 |
| ASF/P10/VietNam/2020 | VietNam        | MW451104.1 | 1 |
| ASF/P15/VietNam/2020 | VietNam        | MW451105.1 | 1 |
| VNUA_Hanoi-ASF9      | Vietnam        | MZ812719.1 | 1 |
| Korea/Pig/Paju1/2019 | Southern-Korea | MN631140.1 | 1 |
